# Supplementary material
Source: Springer Nature journal article supplement (https://www.springerprofessional.de/resource/supplementary/40095_2012_14_MOESM3_ESM.pdf/11899642)

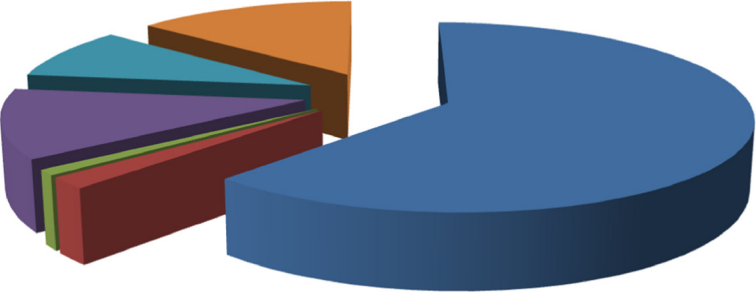

**Organic** 62 %

**Metal** 2 %

**Glass** 1 %

**Plastics** 12 %

**Paper/Cardboard** 9 %

**Other** 14 %

Supplement: MOESM3 [file 11899642]
